# Supplementary material
Source: PubMed Central journal article supplement (PMC7923356)
Supplement: pnas.2021386118.sapp.pdf [file pnas.2021386118.sapp.pdf]

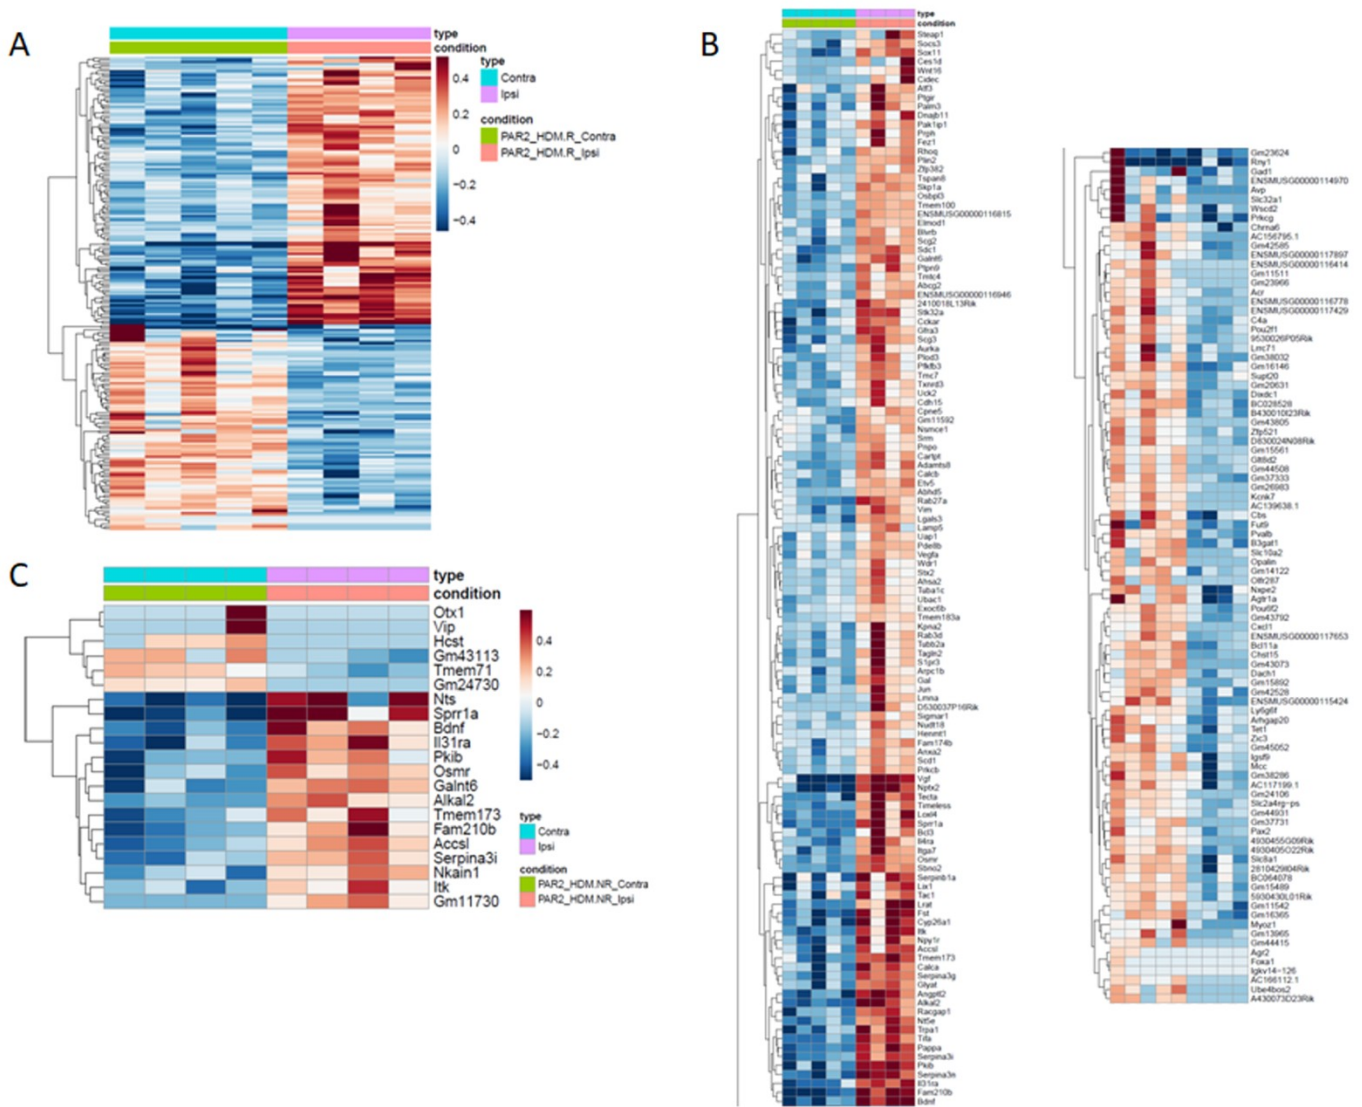

**Supplementary Figure 1:** Hierarchical clustering of up-(dark red) and down-(dark blue) regulated genes in HDM-treated *Grhl3*<sup>PAR2+</sup> responder (A-B) and non-responder (C) mice.

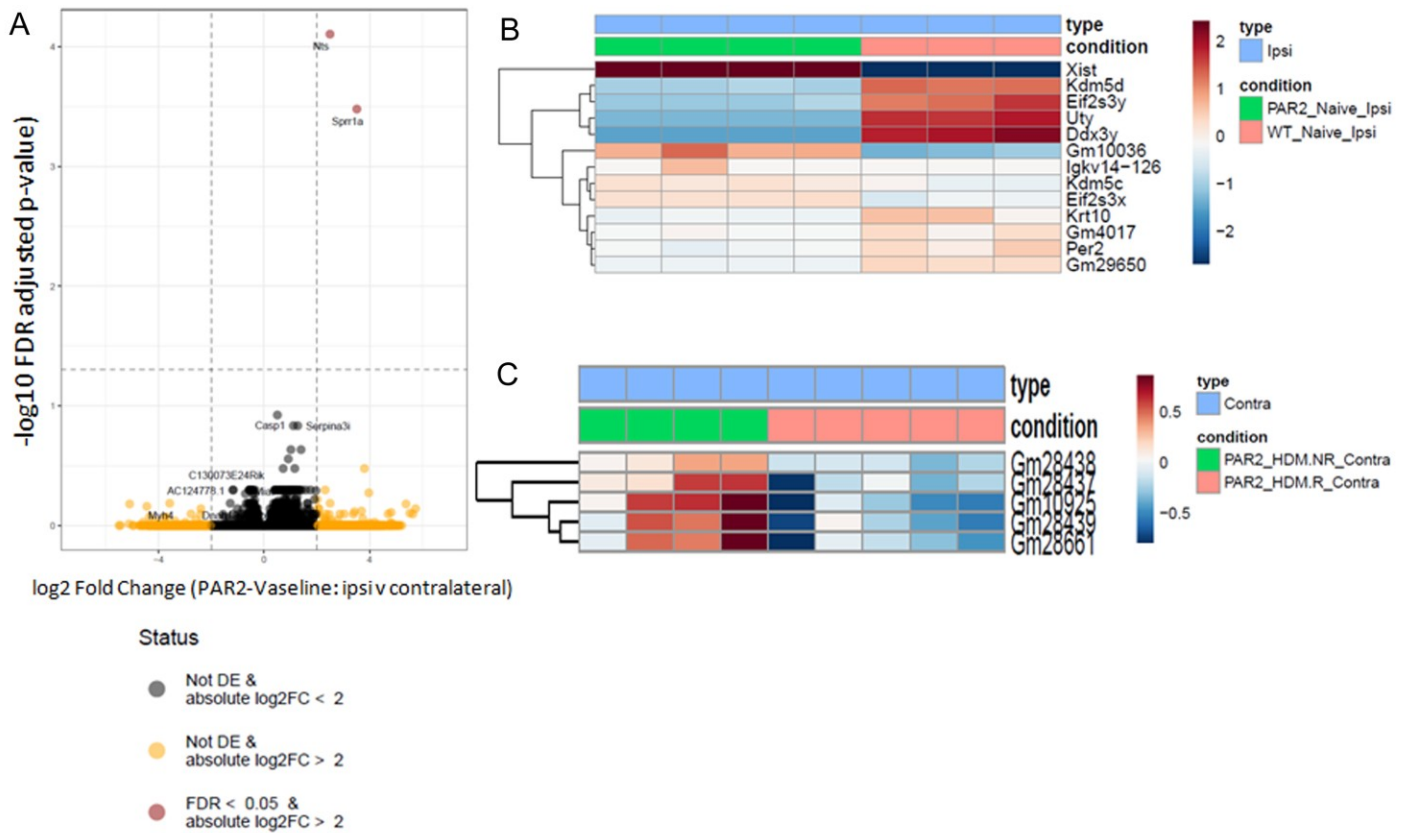

**Supplementary Figure 2:** (A) Volcano plot illustrates that only two genes (Sprr1a and neurotensin, NTS) were significantly upregulated in the TG by Vaseline/SDS treatment in the *Grhl3*<sup>PAR2/+</sup> mice. (B-C) Heat map illustrates genes that were differentially expressed in the TG of untreated (naive) *Grhl3*<sup>PAR2/+</sup> (PAR2\_Naive\_ipsi) and WT (WT\_Naive\_ipsi) mice (B) or in the contralateral TG of HDM-treated *Grhl3*<sup>PAR2/+</sup> responder (PAR2\_HDM.R\_Contra) and non-responder (PAR2\_HDM.NR\_Contra) mice.

| Sequencing                                | RIN | Reads (total) | Reads (aligned) | Alignment rate (%) | Reads (filtered) | Alignment rate filtered (%) | side   | N |
|-------------------------------------------|-----|---------------|-----------------|--------------------|------------------|-----------------------------|--------|---|
| WT-Naive                                  | 8.3 | 1.13E+08      | 9.24E+07        | 82                 | 6.54E+07         | 58                          | contra | 4 |
| WT-Naive                                  | 8.6 | 1.07E+08      | 8.68E+07        | 81                 | 6.35E+07         | 60                          | ipsi   | 4 |
| Ghr13 <sup>PAR2/+</sup> Naive             | 8.6 | 1.08E+08      | 8.36E+07        | 77                 | 6.27E+07         | 58                          | contra | 4 |
| Ghr13 <sup>PAR2/+</sup> Naive             | 8.8 | 1.11E+08      | 8.24E+07        | 74                 | 5.91E+07         | 54                          | ipsi   | 4 |
| Ghr13 <sup>PAR2/+</sup> Vaseline          | 8.5 | 1.27E+08      | 8.92E+07        | 71                 | 6.66E+07         | 53                          | contra | 4 |
| Ghr13 <sup>PAR2/+</sup> Vaseline          | 8.5 | 1.28E+07      | 6.64E+07        | 80                 | 4.98E+07         | 60                          | ipsi   | 4 |
| Ghr13 <sup>PAR2/+</sup> HDM/Non responder | 8.7 | 1.30E+08      | 9.56E+07        | 75                 | 7.35E+07         | 57                          | contra | 4 |
| Ghr13 <sup>PAR2/+</sup> HDM/Non responder | 8.9 | 1.06E+08      | 7.71E+07        | 72                 | 6.05E+07         | 56                          | ipsi   | 4 |
| Ghr13 <sup>PAR2/+</sup> HDM/Responder     | 8.7 | 1.43E+08      | 9.89E+07        | 69                 | 7.60E+07         | 53                          | contra | 4 |
| Ghr13 <sup>PAR2/+</sup> HDM/Responder     | 8.8 | 1.39E+08      | 9.61E+07        | 69                 | 7.49E+07         | 54                          | ipsi   | 5 |

**Supplementary Table 1: RNA-sequencing parameters.** Results after bulk RNA-sequencing of ipsilateral and contralateral trigeminal ganglia (TG) from WT, Vaseline-treated *Ghr13*<sup>PAR2/+</sup> and HDM-treated *Ghr13*<sup>PAR2/+</sup> mice. Input RNA was of high quality (> 8 RIN) and the final, filtered sequencing depth was between 50-90 million reads.

| Allele                         | Forward Primer (5' – 3') | Reverse Primer (5' – 3') |
|--------------------------------|--------------------------|--------------------------|
| 9130204L05Rik                  | GGGTGGCTCTTCTCCTTTGTA    | AAAGGTGGGCAGAACTGCTT     |
| Actb                           | GCCTTCCTTCTTGGGTATGGAA   | CAGCTCAGTAACAGTCCGCC     |
| Angptl2                        | CAGGAGAGAAGAGGCTTTCAGT   | TTCATGTTGCGGCTCTCCTT     |
| Bdnf                           | GACGACATCACTGGCTGACA     | ATTGCGAGTTCAGTGCCTT      |
| Cma1                           | CACGGAGTGCATACCACACT     | GAACCTTCTGGAAGCTCAGGG    |
| Defb8                          | ATTTCTCCTGGTGCTGCTGTG    | GCAGCATTTGAAAGGAGATCC    |
| <i>Ghr13</i> <sup>PAR2/+</sup> | CACCCCCTCAGCTAAGAAGGAA   | CTGGGTTTCCAATCTGCCAATAAG |
| Il1b                           | TGCCACCTTTTGACAGTGATG    | AAGGTCCACGGGAAAGACAC     |
| Il4ra                          | TTACTATACACACGCCGAGCC    | ATGCCAGGACCCTTCTCTCT     |
| Klk7                           | GGGGTGCTGGTGGACAAATA     | GAGGGAAAGGTCACGTCTGG     |
| Nptx2                          | AATAGGGCCTCTCCCTCGTT     | CGGGGGAAATACTCGATGGG     |
| Npy1r                          | CGTTCCTGCTAGGCATCAT      | AGGGACCTGTTTTGCCACTT     |
| Ptgds2                         | CACTCTATCACTGGCACCCC     | TTGGCACATTTCTTCCCCCA     |
| Spink12                        | AGCAGGTGCCTTTCTGCTTT     | AGAATGCACAGCGGTTTTGG     |
| Tmem79                         | AGCTCCTTTCCGGAGATCCT     | CAAGGAGCCCGAGTACGATG     |
| Trpa1                          | CTCCATGGGATGACCCCTCT     | AGAACCACTTCCTTGCGCTT     |
| Vgf                            | CATCGCTCATACTCCAGCCA     | GGGCTCTCCAGATTGACTCG     |

**Supplementary Table 2:** Sequence of the primers we used for qPCR and *Ghr13*<sup>PAR2/+</sup> genotyping.

| <i>Ghr13</i> <sup>PAR2/+</sup> | Baseline scratching (bouts/30 min) | Post-HDM scratching (bouts/30 min) |
|--------------------------------|------------------------------------|------------------------------------|
| HDM-NR                         | 2                                  | 5                                  |
| HDM-NR                         | 0                                  | 4                                  |
| HDM-NR                         | 11                                 | 14                                 |
| HDM-NR                         | 4                                  | 4                                  |
| HDM-R                          | 8                                  | 65                                 |
| HDM-R                          | 1                                  | 76                                 |
| HDM-R                          | 9                                  | 134                                |
| HDM-R                          | 23                                 | 63                                 |
| HDM-R                          | 4                                  | 203                                |

**Supplementary Table 3:** Scratching bouts of the *Ghr13*<sup>PAR2/+</sup> mice that were included in the RNA-Seq analysis.
